# Supplementary material
Source: MDPI journal article supplement (https://www.mdpi.com/1996-1073/14/22/7629)
Supplement: s1 [file s1]

Supplementary

# Nitrogen-Doped and Carbon-Coated Activated Carbon as a Conductivity Additive-Free Electrode for Supercapacitors

Su-Jin Jang <sup>1,2</sup>, Jeong Han Lee <sup>1,2</sup>, Seo Hui Kang <sup>1,2</sup>, Yun Chan Kang <sup>2</sup> and Kwang Chul Roh <sup>1,\*</sup>

<sup>1</sup> Energy and Environmental Division, Korea Institute of Ceramic Engineering and Technology, Jin-ju 52851, Korea; jsjin@kicet.re.kr (S.-J.J.); lunhan2@kicet.re.kr (J.H.L.); leakang18@kicet.re.kr (S.H.K.)

<sup>2</sup> Department of Materials Science and Engineering, Korea University, Anam-dong, Seongbuk-gu, Seoul 136-713, Korea; yckang@korea.ac.kr

\* Correspondence: rkc@kicet.re.kr; Tel.: +82-55-792-2625

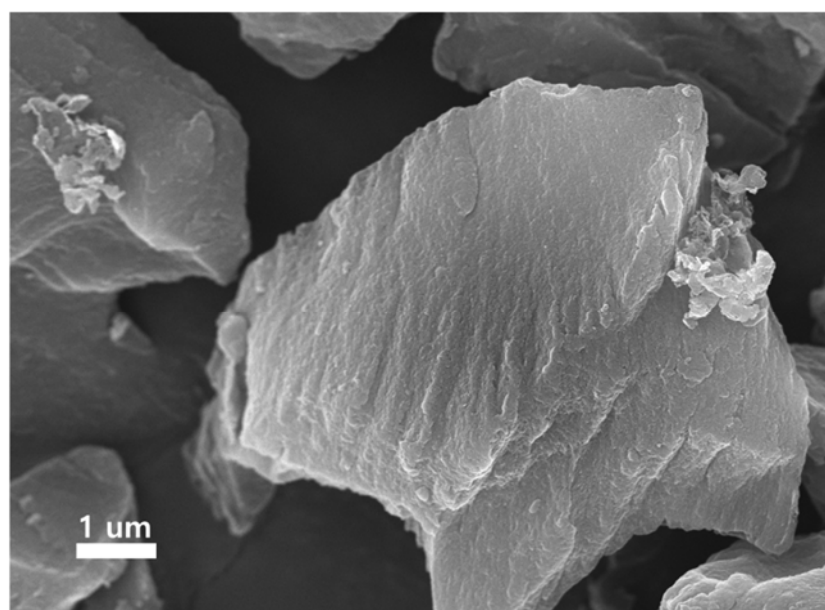

Figure S1. SEM images of CAC.

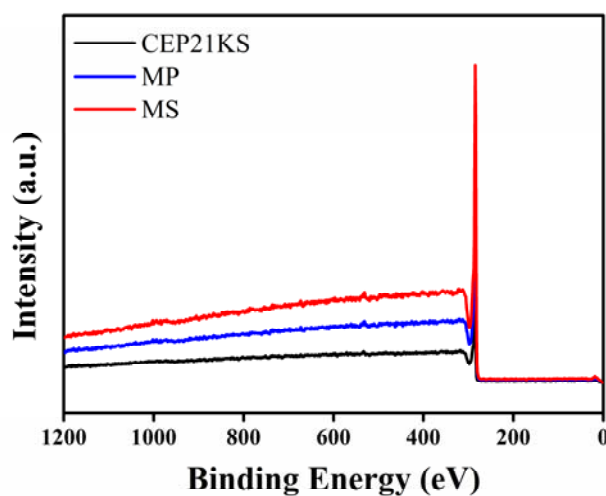

Figure S2. XPS survey spectra of samples.

**Table S1.** Surface elemental composition and C1s bonding composition of CAC, MS, and MP.

|     | Surface Atomic Com-<br>Position (at.%) |     |     | Binding Composition (%) |              |               |       |                 |
|-----|----------------------------------------|-----|-----|-------------------------|--------------|---------------|-------|-----------------|
|     | C                                      | O   | N   | C=C, C-<br>C            | C-O, C-<br>N | C=O,<br>O=C-N | O-C=O | $\pi$ - $\pi^*$ |
| CAC | 96.9                                   | 3.1 | -   | 60.9                    | 10.3         | 12.8          | 5.3   | 10.7            |
| MS  | 98.5                                   | 1.0 | 0.5 | 63.4                    | 12.2         | 2.3           | 8.2   | 13.9            |
| MP  | 98.2                                   | 1.2 | 0.6 | 64.9                    | 11.3         | 2.5           | 11.1  | 10.2            |

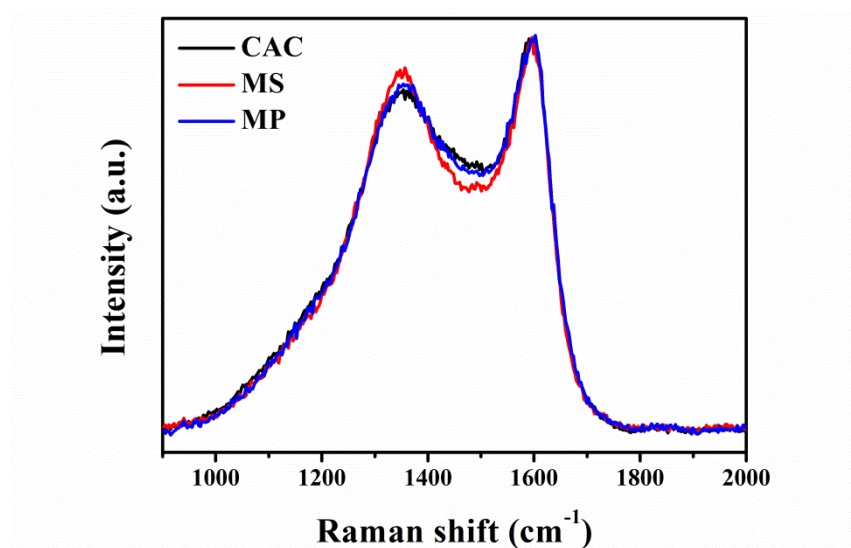**Figure S3.** Raman spectra of all samples.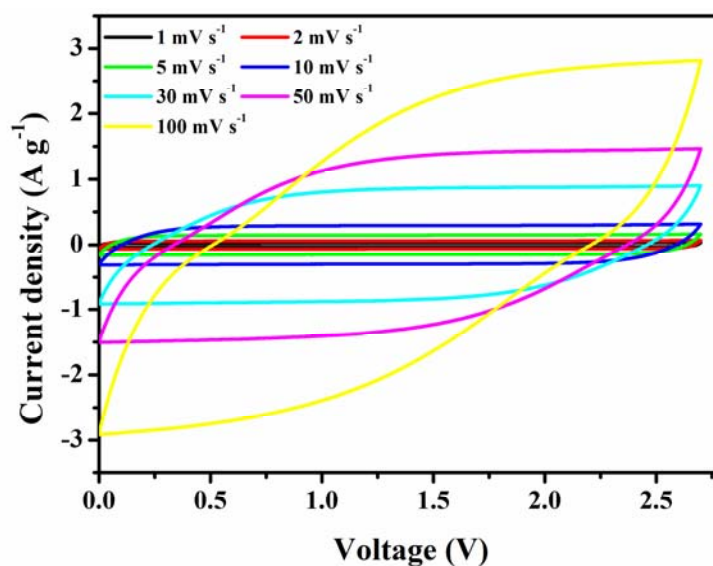**Figure S4.** Cyclic voltammetry curves of MP measured with different scan rate.

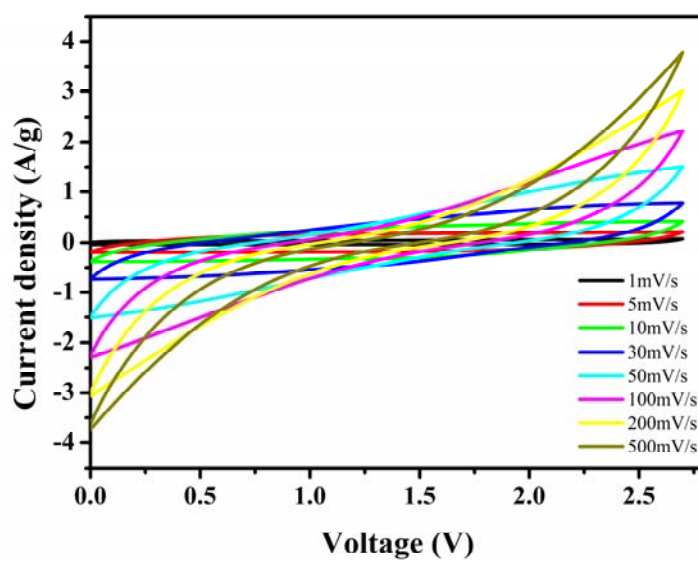

Figure S5. Cyclic voltammetry curves of CAC measured with different scan rate.

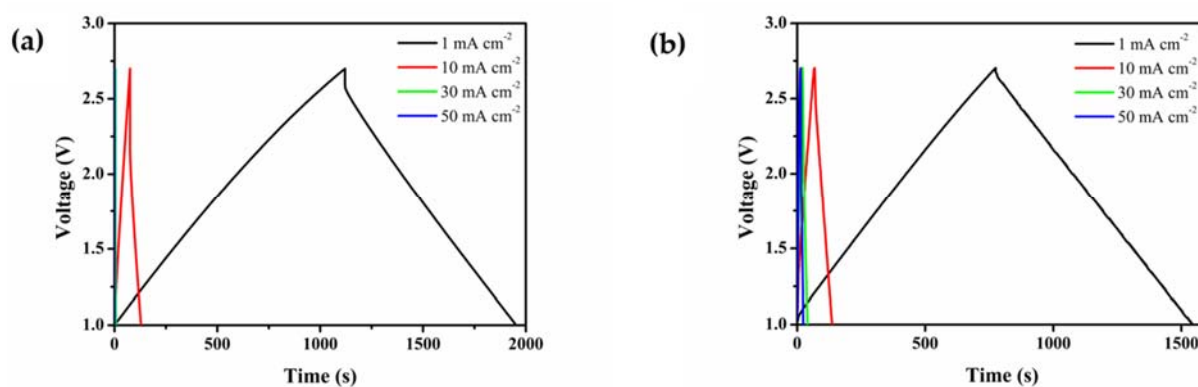

Figure S6. GCD profile of (a) CAC, and (b) MP.

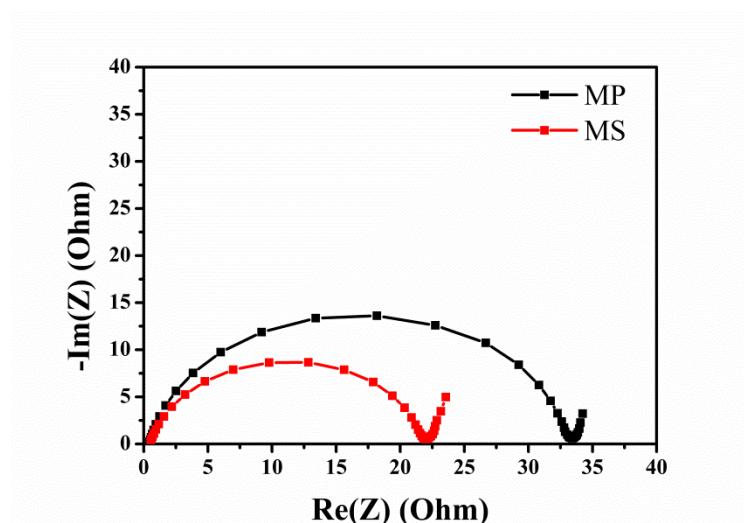

Figure S7. Comparison of electrochemical impedance spectroscopy (EIS) of MS and MP.

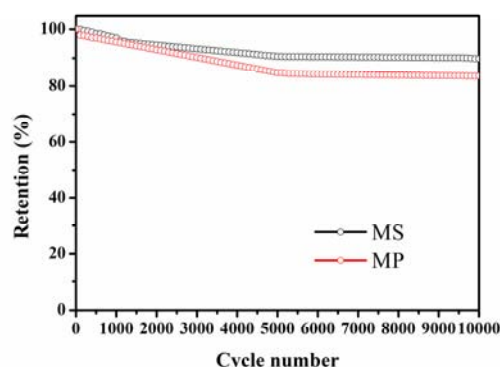

Figure S8. Cycle stability for MP and MS at 10 mA cm<sup>-2</sup>.

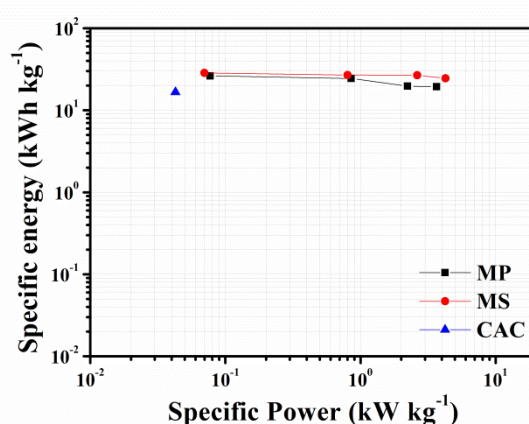

Figure S9. Ragone plots.

Table S2. Comparison of nitrogen-doped activated carbon in TEABF<sub>4</sub>/AN electrolyte.

| Sample name | Nitrogen Content (at.%) | Electrolyte            | Current Density | Capacitance | ED (Wh/kg) | PD (W/kg) | Reference |
|-------------|-------------------------|------------------------|-----------------|-------------|------------|-----------|-----------|
| NCF(Fe)     | 5.34                    | TEABF <sub>4</sub> /AN | 0.5 A/g         | 119.2 F/g   | 25.9       | 634       | [1]       |
| CAC 1:0     | 0.3                     | TEABF <sub>4</sub> /AN | 0.5 A/g         | 49 F/cc     | -          | -         | [2]       |
| CAC 1:1     | 6.99                    | TEABF <sub>4</sub> /AN | 0.5 A/g         | 83 F/cc     | 42         | 750       | [2]       |
| CAC 1:10    | 16.7                    | TEABF <sub>4</sub> /AN | 0.5 A/g         | 46 F/cc     | -          | -         | [2]       |
| NAC@Gr5     | 5.1                     | TEABF <sub>4</sub> /AN | 1.0 A/g         | 107 F/cc    | 13.2       | 25        | [3]       |
| MS          | 0.5                     | TEABF <sub>4</sub> /AN | 0.05 A/g        | 70.4 F/cc   | 24.5       | 4265      | This work |

## References

1. Ni, L.; Wang, R.; Wang, H.; Sun, C.; Sun, B.; Guo, X.; Jiang, S.; Shi, Z.; Jing, W.; Zhu, L. Designing nanographitic domains in N-doped porous carbon foam for high performance supercapacitors. *Carbon* **2018**, *139*, 1152–1159.
2. Mittravinda, T.; Anandan, S.; Sharma, C.S.; Rao, T.N. Design and development of honeycomb structured nitrogen-rich cork derived nanoporous activated carbon for high-performance supercapacitors, *J. Energy Storage* **2021**, *34*, 102017.
3. Zhou, S.; Xie, Q.; Wu, S.; Huang, X.; Zhao, P. Influence of graphene coating on supercapacitive behavior of sandwich-like N-and O-enriched porous carbon/graphene composites in aqueous and organic electrolytes. *Ionics* **2017**, *23*, 1499–1507.
